# Supplementary material for: N-type perylene-based organic semiconductors for functional neural interfacing
Source: Royal Society of Chemistry journal article supplement (doi:10.1039/c3tb20555j), 2013-01-01
Supplement: c3tb20555j.pdf [file c3tb20555j.pdf]

## Supplementary Information

### N-type perylene-based organic semiconductors for functional neural interfacing

Stefano Toffanin, et al.

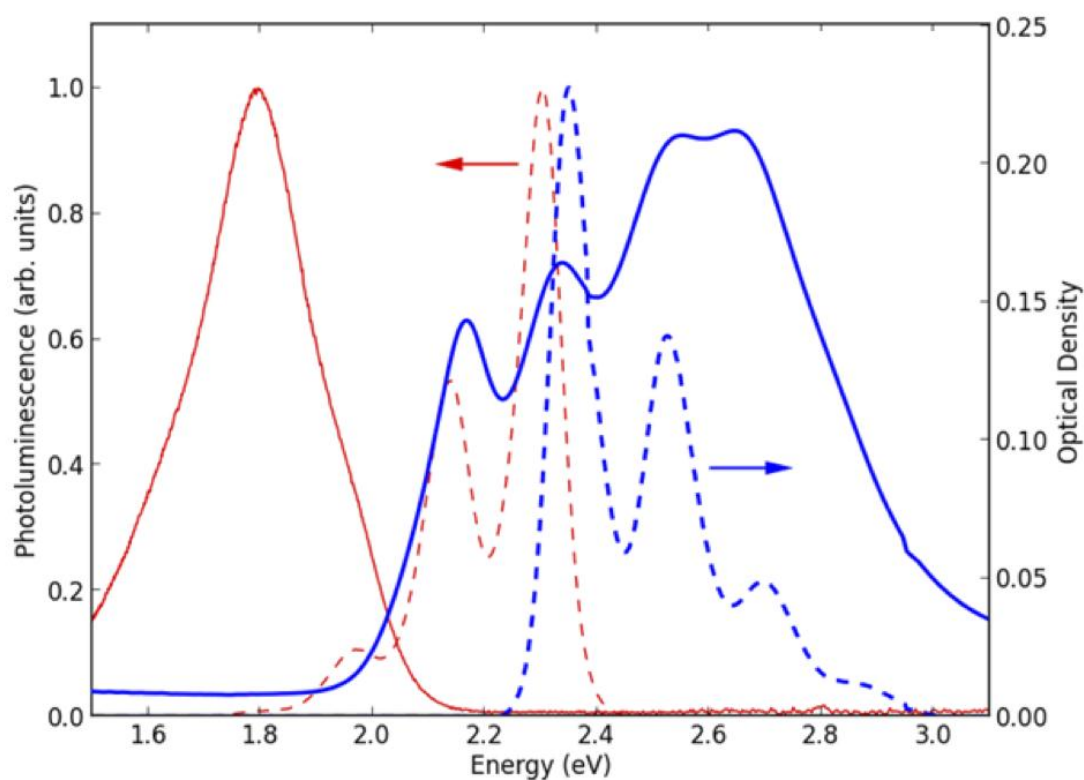

**Figure S1.** Absorption (blue lines) and photoluminescence (red lines) spectra of P13 in solution (dashed lines) and in thin-film on quartz (solid lines). The differences between the thin-film and the solution spectra indicate the high degree of intermolecular interaction in the condensed phase.
